# Supplementary material
Source: MDPI journal article supplement (https://www.mdpi.com/2073-4395/10/10/1480)
Supplement: s1 [file s1]

Table S1

**Table S1.** SPAD values and associated standard errors from young cucumber leaves (leaves developed after the first measure at DAT -8) and mature cucumber leaves for the tested treatments. Different letters indicate significant differences among treatments in a post-hoc Duncan test;  $n = 6$ .

| young leaves           |                   |                   |                   |                    |                    |
|------------------------|-------------------|-------------------|-------------------|--------------------|--------------------|
| DAT                    | 7                 | 4                 | 3                 | 2                  | 1                  |
| -Fe                    | 12.2 $\pm$ 5.3 b  | 2.6 $\pm$ 0.1 b   | 3.0 $\pm$ 0.4 b   | 2.1 $\pm$ 1.6 b    | 3.2 $\pm$ 2.7 b    |
| EDDHA/Fe <sup>3+</sup> | 45.0 $\pm$ 4.2 a  | 39.3 $\pm$ 6.0 a  | 33.0 $\pm$ 5.3 a  | 25.3 $\pm$ 5.8 a   | 16.0 $\pm$ 8.1 a   |
| EDTA/Fe <sup>3+</sup>  | 45.0 $\pm$ 4.0 a  | 38.6 $\pm$ 8.4 a  | 32.6 $\pm$ 5.8 a  | 27.6 $\pm$ 6.2 a   | 14.6 $\pm$ 8.6 ab  |
| Fe-heme                | 37.5 $\pm$ 9.2 a  | 31.0 $\pm$ 8.8 a  | 29.0 $\pm$ 8.7 a  | 18.5 $\pm$ 10.3 ab | 14.1 $\pm$ 11.8 ab |
| $\alpha$               | 0.001             | 0.001             | 0.001             | 0.001              | 0.1                |
| Mature leaves          |                   |                   |                   |                    |                    |
| -Fe                    | 17.9 $\pm$ 5.7 b  | 15.6 $\pm$ 10.3 b | 16.5 $\pm$ 10.5 b | 16.8 $\pm$ 9.6 b   | 17.7 $\pm$ 10.2    |
| EDDHA/Fe <sup>3+</sup> | 37.2 $\pm$ 9.7 a  | 36.2 $\pm$ 7.1 a  | 31.5 $\pm$ 5.8 a  | 25.2 $\pm$ 7.3 a   | 20.5 $\pm$ 7.2     |
| EDTA/Fe <sup>3+</sup>  | 38.8 $\pm$ 6.4 a  | 36.3 $\pm$ 5.5 a  | 32.1 $\pm$ 6.4 a  | 26.5 $\pm$ 8.5 a   | 20.1 $\pm$ 8.6     |
| Fe-heme                | 28.2 $\pm$ 6.5 ab | 24.4 $\pm$ 5.2 b  | 24.3 $\pm$ 6.9 ab | 21.9 $\pm$ 7.4 ab  | 23.3 $\pm$ 8.7     |
| $\alpha$               | 0.001             | 0.001             | 0.001             | 0.05               | 0.1                |
