# Supplementary material
Source: MDPI journal article supplement (https://www.mdpi.com/2073-4395/10/10/1480)
Supplement: s1 [file s1]

Table S2

**Table S2.** SPAD increments and standard errors along plant axis for nodes 1 to 6 for the tested treatments. Different letters indicate significant differences among treatments in a post-hoc Duncan test (ns: non-significant difference).

| Node 1                 |               |               |                |               |                |
|------------------------|---------------|---------------|----------------|---------------|----------------|
| DAT                    | 7             | 4             | 3              | 2             | 1              |
| -Fe                    | -15.1 ± 5.3 b | -11.6 ± 5.7 b | -10.9 ± 6.3 b  | -12.9 ± 5.2 b | -17.6 ± 2.6 b  |
| EDDHA/Fe <sup>3+</sup> | 5.0 ± 7.6 a   | 3.6 ± 5.8 a   | -0.9 ± 3.4 a   | -4.8 ± 2.9 a  | -12.5 ± 3.3 a  |
| EDTA/Fe <sup>3+</sup>  | 0.5 ± 4.9 a   | 1.3 ± 5.6 a   | -3.0 ± 6.6 a   | -6.0 ± 4.6 a  | -12.0 ± 4.4 a  |
| Fe-heme                | -4.2 ± 4.8 a  | -9.2 ± 4.2 b  | -7.8 ± 4.2 ab  | -12.5 ± 5.3 b | -11.1 ± 6.6 a  |
| $\alpha$               | 0.005         | 0.01          | 0.01           | 0.01          | 0.05           |
| Node 2                 |               |               |                |               |                |
| -Fe                    | -27.4 ± 7.2 c | -19.8 ± 0.7 c | -18.6 ± 6.2 c  | -16.2 ± 7.6   | -9.3 ± 10.7    |
| EDDHA/Fe <sup>3+</sup> | 3.7 ± 7.8 a   | 1.0 ± 5.9 a   | -4.2 ± 4.1 ab  | -12.2 ± 5.2   | -13.3 ± 8.5    |
| EDTA/Fe <sup>3+</sup>  | 9.5 ± 6.2 a   | 3.5 ± 3.8 a   | 1.5 ± 3.1 a    | -11.4 ± 7.5   | -12.0 ± 4.4    |
| Fe-heme                | -9.8 ± 2.8 b  | -11.5 ± 2.8 b | -13.5 ± 3.6 bc | -15.5 ± 8.7   | -16.8 ± 9.4    |
| $\alpha$               | 0.001         | 0.001         | 0.005          | ns            | ns             |
| Node 3                 |               |               |                |               |                |
| -Fe                    | -28.8 ± 1.7 b | -27.9 ± 0.7 b | -27.3 ± 1.6 b  | -27.3 ± 1.5 c | -26.9 ± 1.5 b  |
| EDDHA/Fe <sup>3+</sup> | 8.3 ± 10.6 a  | 4.9 ± 5.5 a   | -1.5 ± 3.9 a   | -9.1 ± 2.7 ab | -16.7 ± 2.1 a  |
| EDTA/Fe <sup>3+</sup>  | 15.4 ± 3.9 a  | 4.7 ± 10.9 a  | 1.8 ± 6.8 a    | -3.2 ± 6.4 a  | -14.7 ± 8.1 a  |
| Fe-heme                | 2.6 ± 11.0 a  | -5.5 ± 7.1 a  | -3.5 ± 7.8 a   | -15.4 ± 7.7 b | -23.4 ± 6.8 ab |
| $\alpha$               | 0.001         | 0.001         | 0.001          | 0.005         | 0.005          |
| Node 4                 |               |               |                |               |                |
| -Fe                    | -3.1 ± 14.9 b | -11.8 ± 0.5 b | -11.8 ± 0.5 b  | -11.8 ± 0.5 b | -6.7 ± 0.5 b   |
| EDDHA/Fe <sup>3+</sup> | 31.7 ± 2.1 a  | 28.6 ± 2.3 a  | 21.0 ± 1.4 a   | 14.2 ± 7.6 a  | -2.7 ± 4.5 b   |
| EDTA/Fe <sup>3+</sup>  | 32.0 ± 4.9 a  | 30.1 ± 5.3 a  | 23.4 ± 4.9 a   | 20.0 ± 0.5 a  | -              |
| Fe-heme                | 29.8 ± 4.0 a  | 23.7 ± 2.3 a  | 23.7 ± 4.0 a   | 16.5 ± 3.8 a  | 15.1 ± 6.7 a   |
| $\alpha$               | 0.001         | 0.001         | 0.001          | 0.001         | 0.05           |
| Node 5                 |               |               |                |               |                |
| EDDHA/Fe <sup>3+</sup> | 36.9 ± 5.1    | 29.8 ± 9.6    | 27.7 ± 6.7     | 18.5 ± 0.5    | 18.7 ± 0.5     |
| EDTA/Fe <sup>3+</sup>  | 37.1 ± 1.9    | 30.6 ± 3.1    | 21.3 ± 3.3     | -             | -              |
| Fe-heme                | 31.6 ± 6.2    | 26.9 ± 0.7    | 26.5 ± 7.7     | -             | -              |
| $\alpha$               | ns            | ns            | ns             |               |                |
| Node 6                 |               |               |                |               |                |
| EDDHA/Fe <sup>3+</sup> | 18.4 ± 5.1 a  | 19.4 ± 0.5    | 13.5 ± 0.5     | 4.4 ± 0.5     | -              |
| Fe-heme                | 2.2 ± 3.8 a   | -             | -              | -             | -              |
| $\alpha$               | ns            |               |                |               |                |
